# Supplementary material for: Combining benzoxazine and ketene chemistries for self-healing of high performance thermoset surfaces
Source: Royal Society of Chemistry journal article supplement (doi:10.1039/c8py00293b), 2018-01-01
Supplement: c8py00293b1.pdf [file c8py00293b1.pdf]

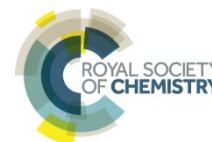

## Combining benzoxazine and ketene chemistries for self-healing of high performance thermoset surfaces

Mustafa Arslan<sup>1</sup>, Amir Motallebzadeh<sup>2</sup>, Baris Kiskan\*<sup>1</sup>, A. Levent Demirel\*<sup>3</sup>, I. Volkan Kumbaraci<sup>1</sup>, Yusuf Yagci\*<sup>1</sup>

<sup>1</sup>Istanbul Technical University, Department of Chemistry, 34469, Maslak, Sariyer, Istanbul, Turkey.

<sup>2</sup>Koc University Surface Science and Technology Centre (KUYTAM), Rumelifeneri Yolu, Sariyer, Istanbul, Turkey.

<sup>3</sup>Koc University, Department of Chemistry, 34450, Rumelifeneri Yolu, Sariyer, Istanbul, Turkey.

\*Corresponding Authors: \*e-mail: (B.K.) [kiskanb@itu.edu.tr](mailto:kiskanb@itu.edu.tr), (A.L.D.) [ldemirel@ku.edu.tr](mailto:ldemirel@ku.edu.tr) and (Y.Y.) [yusuf@itu.edu.tr](mailto:yusuf@itu.edu.tr)

### Table of Contents

|                                                                                                                                                             |   |
|-------------------------------------------------------------------------------------------------------------------------------------------------------------|---|
| <b>Figure S1:</b> <sup>1</sup> H NMR spectrum of MPBz-PEA <sub>400</sub> .....                                                                              | 2 |
| <b>Figure S2:</b> <sup>1</sup> H NMR spectrum of MPBz-PEA <sub>2000</sub> .....                                                                             | 2 |
| <b>Figure S3:</b> <sup>1</sup> H NMR spectrum of MPBz-Et.....                                                                                               | 3 |
| <b>Figure S4:</b> FTIR spectra of MPBz-PEA <sub>2000</sub> (a), MPBz-PEA <sub>400</sub> (b), MPBz-Et (c). .....                                             | 3 |
| <b>Figure S5:</b> DSC traces of MPBz-PEA <sub>2000</sub> (a), MPBz-PEA <sub>400</sub> (b), MPBz-Et (c).....                                                 | 4 |
| <b>Table S1:</b> DSC* characteristics of main chain benzoxazine precursors. ....                                                                            | 4 |
| <b>Figure S6:</b> Depth and width of scratch on the surface of the MPBz-Et film before and after healing.....                                               | 5 |
| <b>Figure S7:</b> Depth and width of scratch on the surface of the MPBz-PEA <sub>400</sub> /BisDiox film before and after healing at room temperature. .... | 5 |

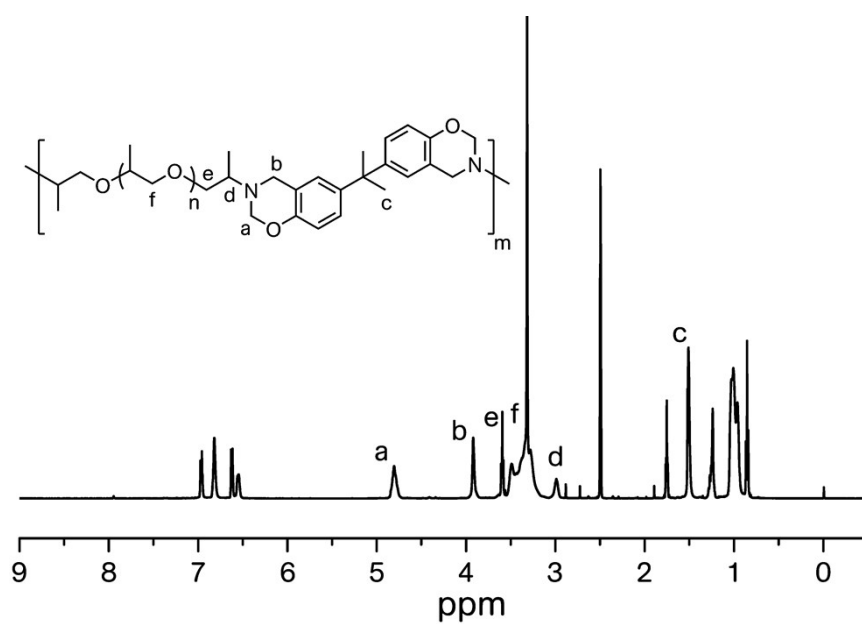

**Figure S1:** <sup>1</sup>H NMR spectrum of MPBz-PEA<sub>400</sub>

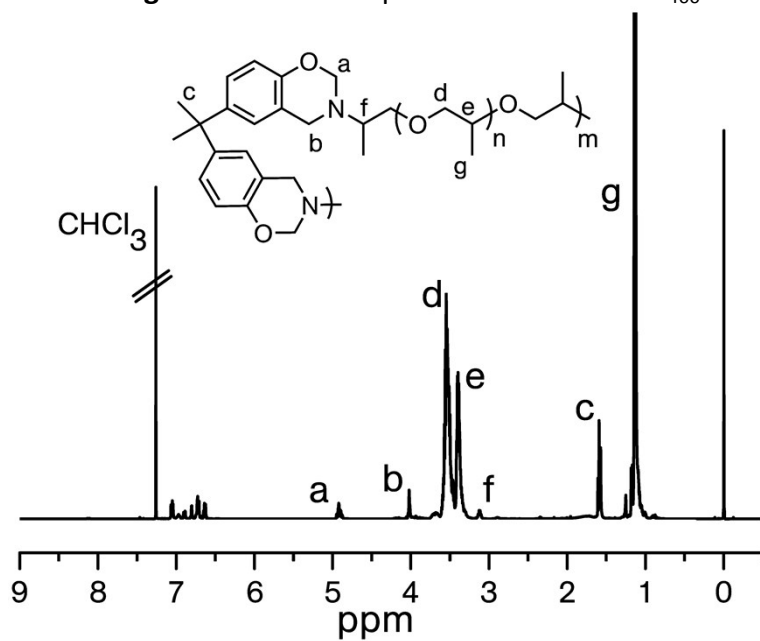

**Figure S2:** <sup>1</sup>H NMR spectrum of MPBz-PEA<sub>2000</sub>

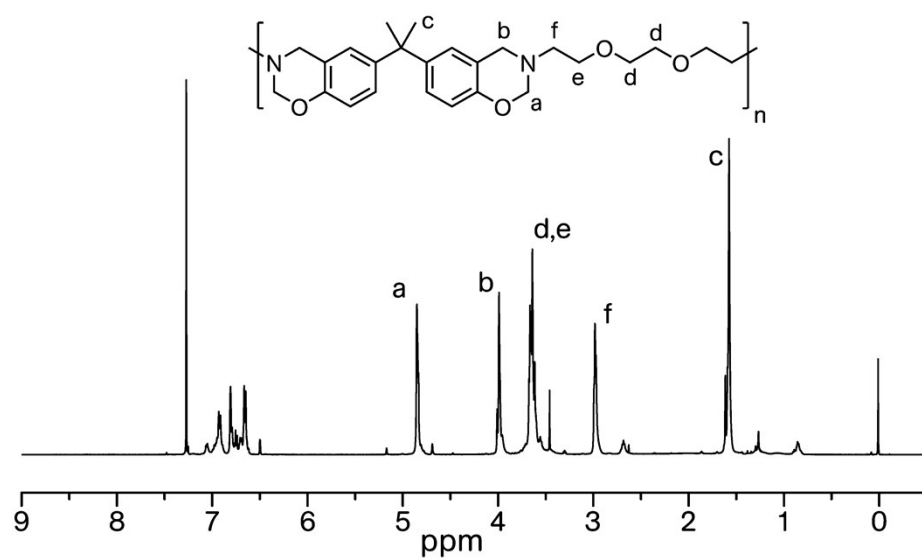

**Figure S3:** <sup>1</sup>H NMR spectrum of MPBz-Et

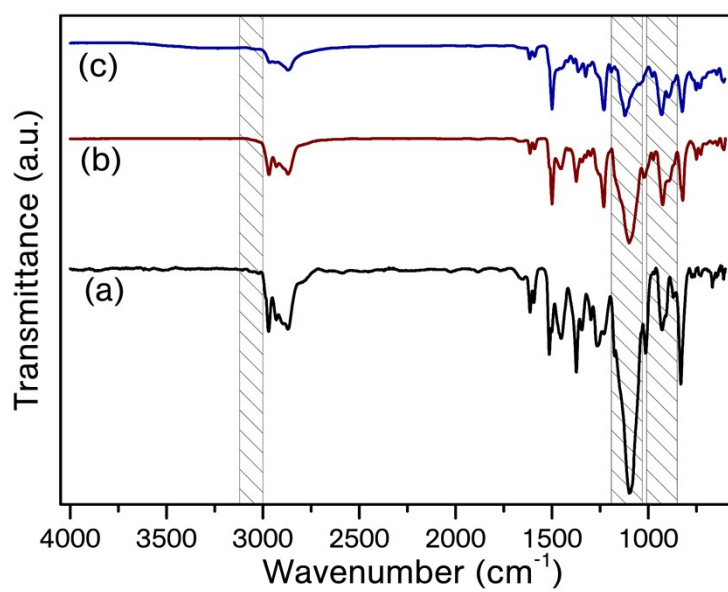

**Figure S4:** FTIR spectra of MPBz-PEA<sub>2000</sub> (a), MPBz-PEA<sub>400</sub> (b), MPBz-Et (c).

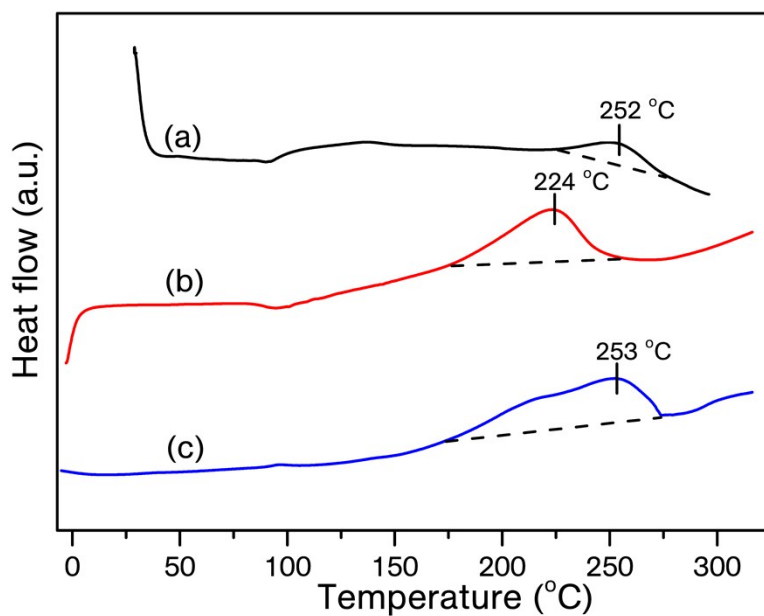

**Figure S5:** DSC traces of MPBz-PEA<sub>2000</sub> (a), MPBz-PEA<sub>400</sub> (b), MPBz-Et (c)

**Table S1:** DSC\* characteristics of main chain benzoxazine precursors.

| Precursor                | On-set temp. of curing (°C) | Maximum curing temp. (°C) | End-set temp. of curing (°C) | $\Delta H$ of curing (j/g) |
|--------------------------|-----------------------------|---------------------------|------------------------------|----------------------------|
| MPBz-Et                  | 172                         | 253                       | 273                          | -109                       |
| MPBz-PEA <sub>400</sub>  | 181                         | 224                       | 250                          | -54                        |
| MPBz-PEA <sub>2000</sub> | 221                         | 252                       | 275                          | -20                        |

\*DSC measurements were performed under nitrogen flow (20 mL.min<sup>-1</sup>) with a scan rate of 10 °C.min<sup>-1</sup>.

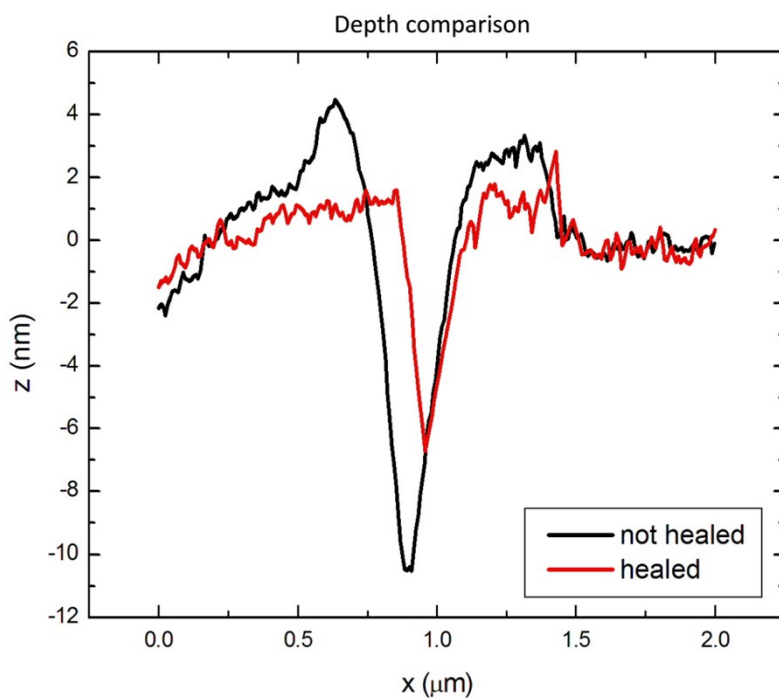

**Figure S6:** Depth and width of scratch on the surface of the MPBz-Et film before and after healing

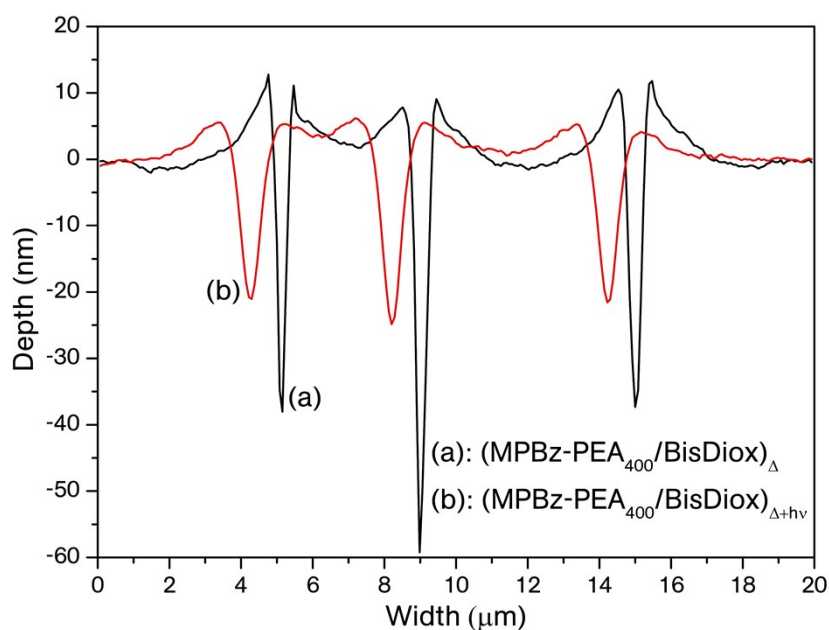

**Figure S7:** Depth and width of scratch on the surface of the MPBz-PEA<sub>400</sub>/BisDiox film before and after healing at room temperature.
